# Supplementary material
Source: PubMed Central journal article supplement (PMC7753906)
Supplement: NIHMS1654690-supplement-1.pdf [file NIHMS1654690-supplement-1.pdf]

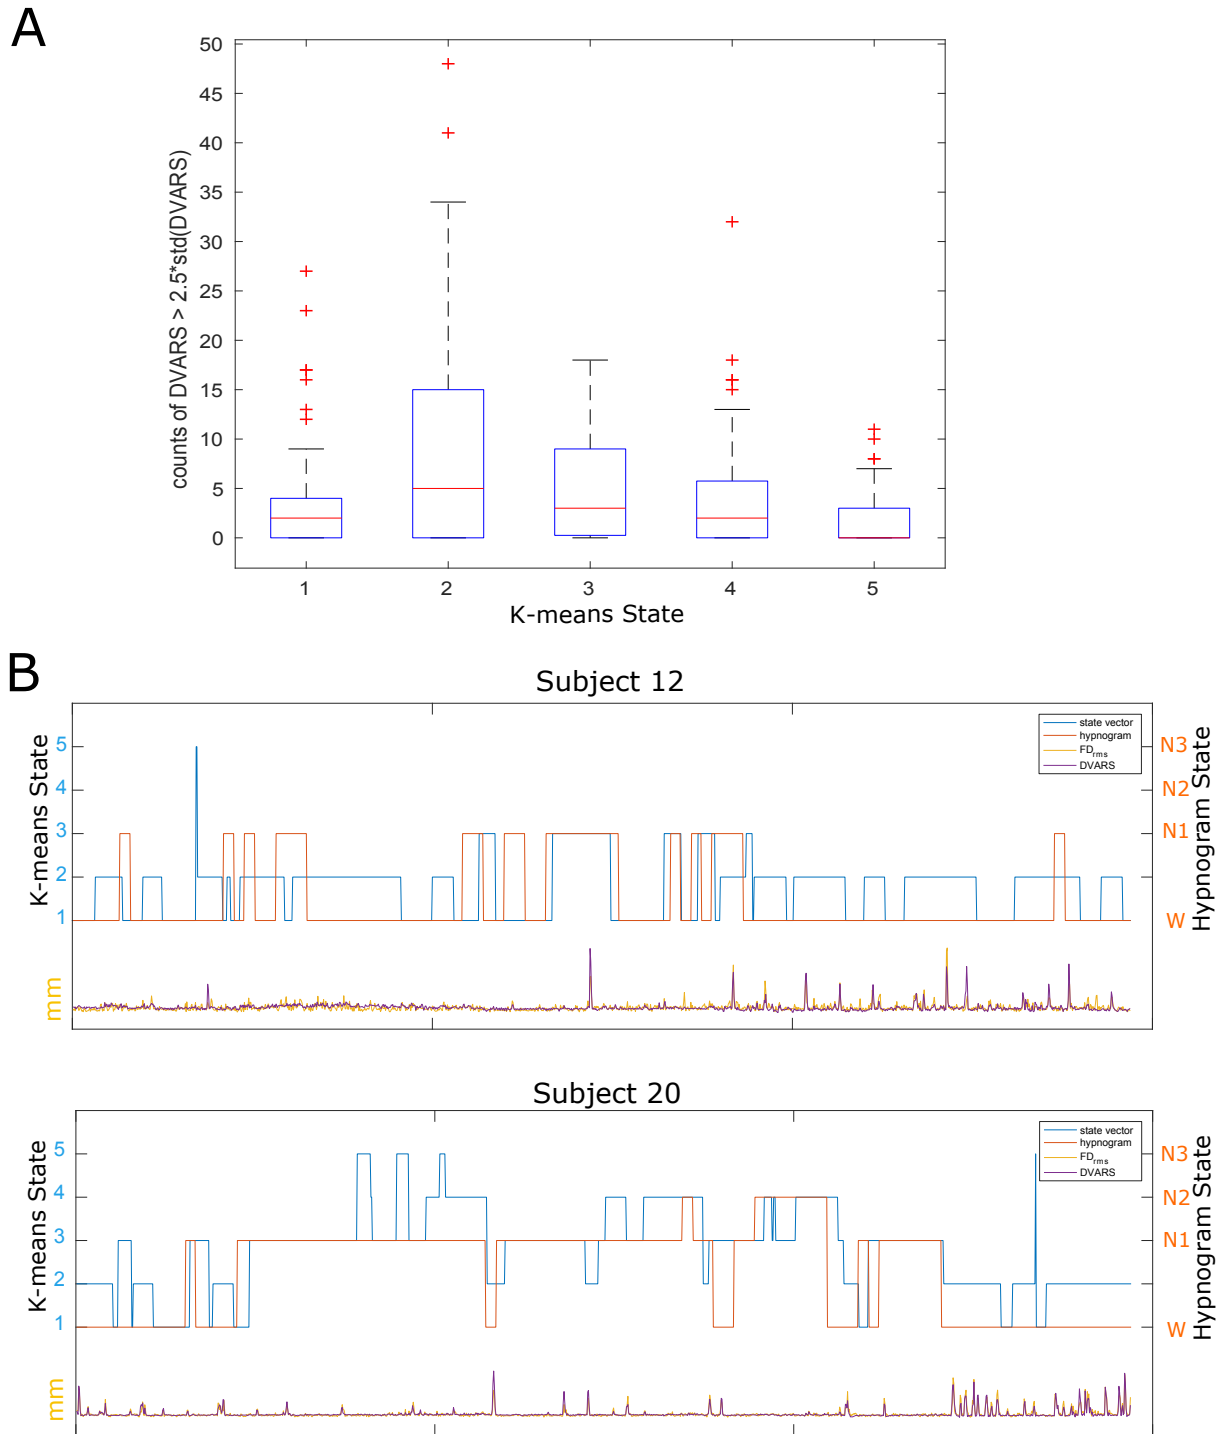

Figure S1: A) Count of number of DVARS of raw data exceeding 2.5 times its standard deviation by K-means state assignment. One-way ANOVA on mean differences in counts is significant with  $F=8.9$  and  $p < 1e-05$ . A similar result is observed using subject FD values. B) Example subject state vector plotted along with his/her hypnogram and head movement summaries (DVARS and FD). As seen, State 2 FC estimates seems to be contaminated by bigger jerky movements from subjects. .

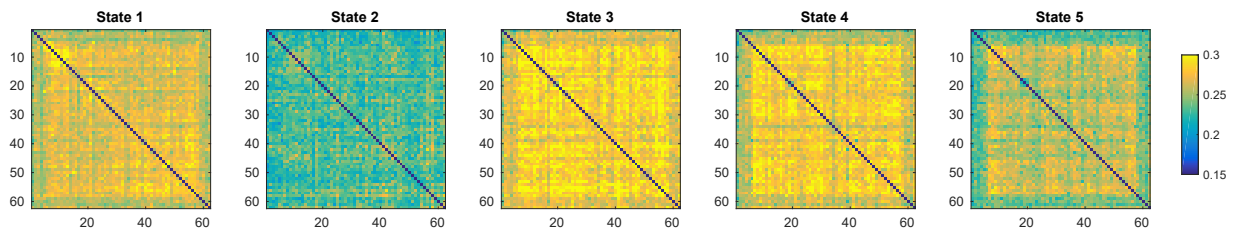

Figure S2: Standard deviation of the dFNC estimates by K-means state. The standard deviation increases for most pairs for States 3 and 4 compared wakeful state 1 and the variability of dFC reduces during deep sleep stage N3.
